# Supplementary material for: Achieving ultra-high energy storage performance in (Bi 0.5 Na 0.5 ) 0.7 Sr 0.3 TiO 3 -based relaxor ferroelectrics
Source: Royal Society of Chemistry journal article supplement (doi:10.1039/d4ta08169b), 2025-01-01
Supplement: d4ta08169b1.pdf [file d4ta08169b1.pdf]

## Achieving ultra-high energy storage performance in $(\text{Bi}_{0.5}\text{Na}_{0.5})_{0.7}\text{Sr}_{0.3}\text{TiO}_3$ -based relaxor ferroelectrics

Xin Zhang, Shiyu Yang, Qinpeng Dong, Yue Pan, Xiuli Chen\*, Xu Li\*, Huanfu Zhou

*Key Laboratory of Nonferrous Materials and New Processing Technology, Ministry of Education, School of Materials Science and Engineering, Guilin University of Technology, Guilin 541004, China.*

### 2. Experimental procedures

$(1-x)(\text{Bi}_{0.5}\text{Na}_{0.5})_{0.7}\text{Sr}_{0.3}\text{TiO}_3-x\text{Sm}(\text{Mg}_{2/3}\text{Nb}_{1/3})\text{O}_3$  ( $x = 0.08, 0.12, 0.16, \text{ and } 0.20$ ), referred to as  $(1-x)\text{BNST}-x\text{SMN}$ , was prepared by the conventional solid state reaction method. The BNST powders were prepared by using  $\text{Bi}_2\text{O}_3$  (99.00 %),  $\text{Na}_2\text{CO}_3$  (99.80 %),  $\text{SrCO}_3$  (99.80 %),  $\text{TiO}_2$  (99.80 %) mixed in a certain ratio,  $\text{Sm}_2\text{O}_3$  (99.99 %),  $\text{MgO}$  (98.50 %),  $\text{Nb}_2\text{O}_5$  (99.50 %) were mixed in a certain ratio to make SMN powder. These powders were mixed with pickaxe balls and anhydrous ethanol for 4 hours, and then drying. The BNST powder and SMN powder were mixed according to certain ratio, mixed for the second ball milling. The resulting powder is pelletized into 60~120 mesh particles by using 8 % PVA glue, and then the particles are pressed into a wafer with a diameter of 8mm, the thickness of about 1.5mm, and finally pressed into the piece in a muffle furnace at  $1^\circ\text{C}/\text{min}$  up to  $550^\circ\text{C}$ , holding time of 4 hours to row out the PVA glue. The samples were put in the precursor powder of the same composition and sintered at  $1240^\circ\text{C}$  for 2 hours. Finally, grinding samples to about 0.1mm and coating a silver paste with 2mm in diameter, the ferroelectric properties were tested after drying.

---

\*Corresponding Authors:

E-mail address: cxlnwpu@163.com (X. Chen), lx100527@163.com (X. Li)

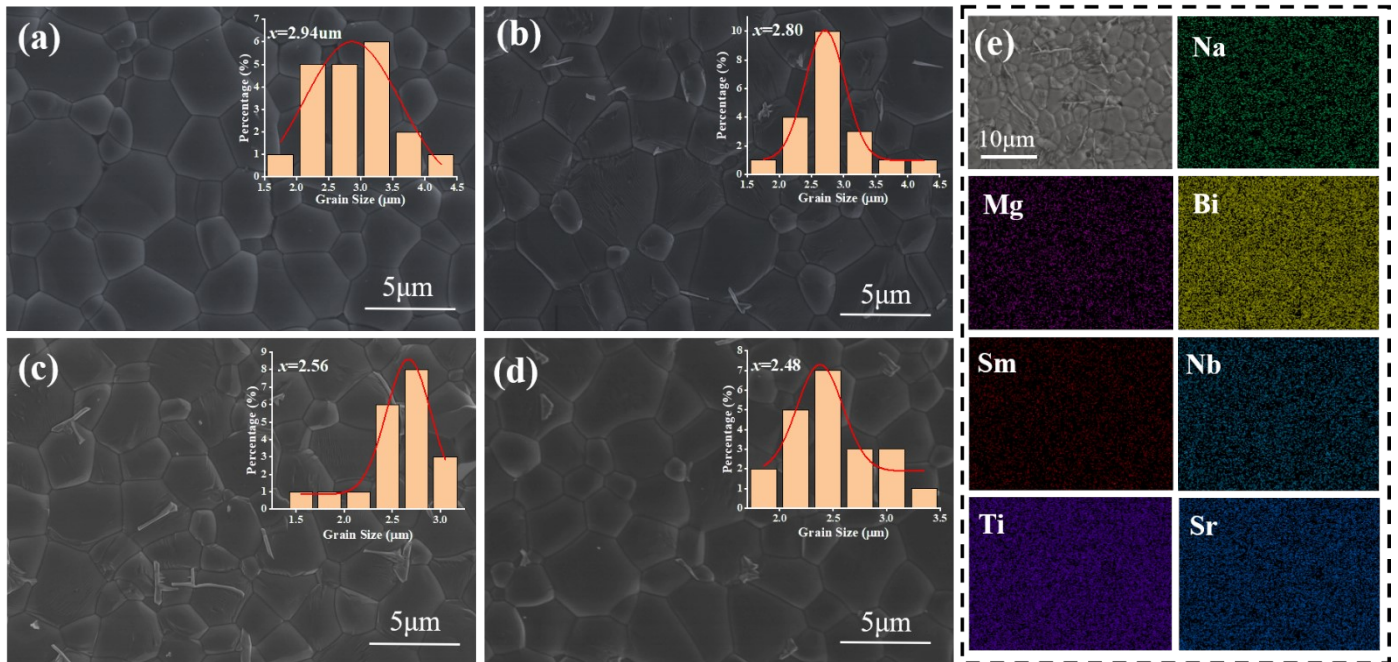

**Figure S1** SEM images (a - d) of the (1-x)BNST-xSMN ( $x = 0.08, 0.12, 0.16,$  and  $0.20$ ) ceramics. (e) Elemental mapping of the 0.12SMN ceramic.

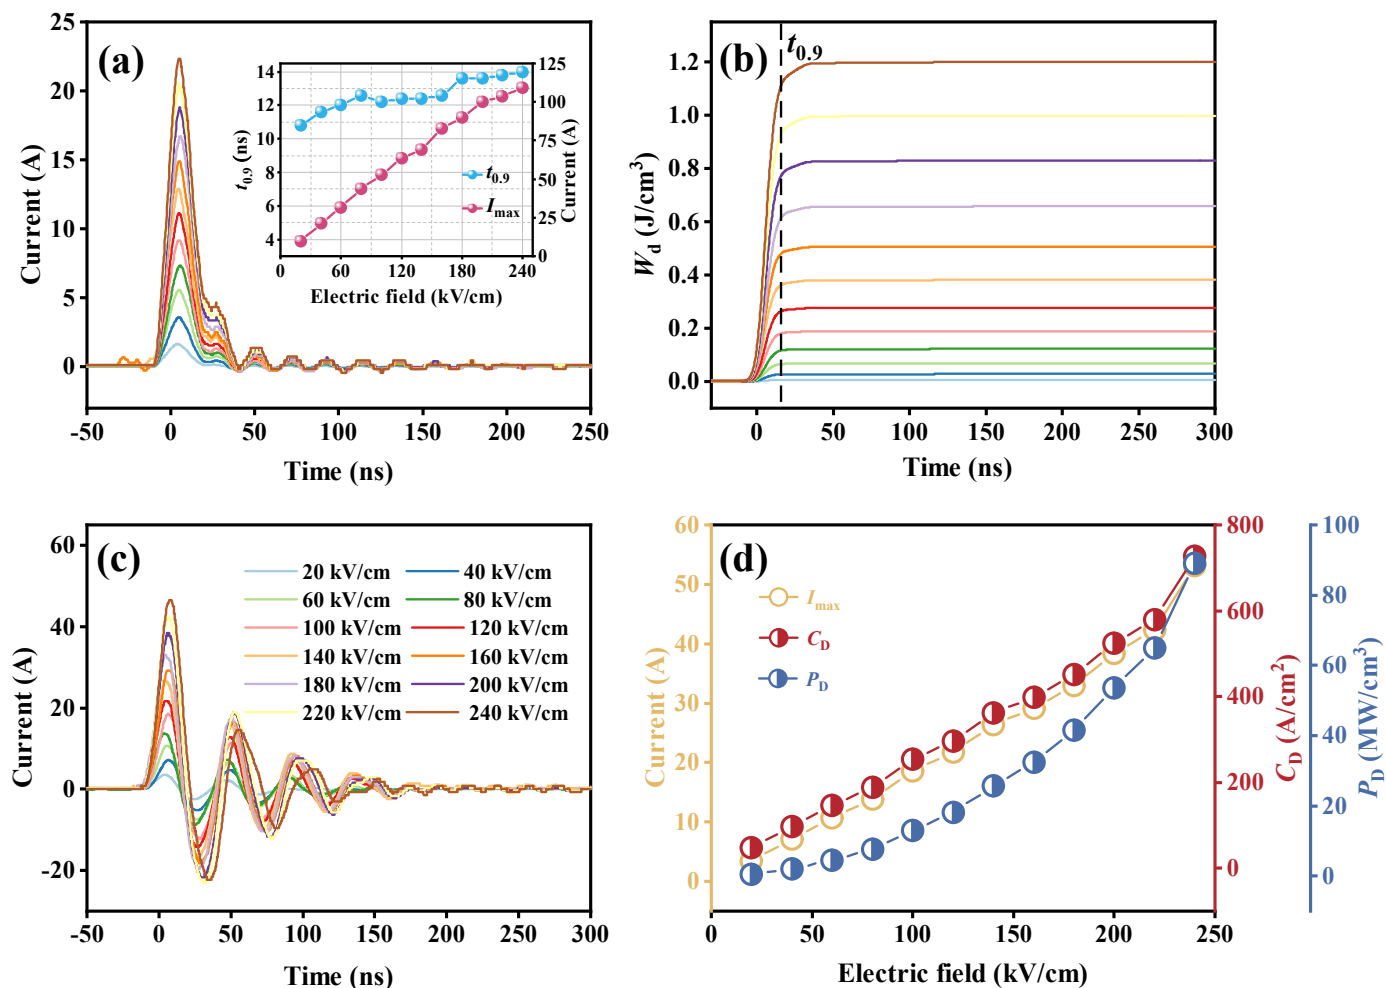

**Figure S2** (a) The overdamped charge-discharge results and  $t_{0.9}$ ,  $I_{\max}$  of  $x$ SMN ceramics under different electric fields at room temperature. (b) Time-dependence of pulsed discharge energy density of  $x$ SMN ceramics. (c) Underdamped discharge waveform of 0.12SMN ceramic at room temperature. (d) Changes of  $I_{\max}$ ,  $C_D$ , and  $P_D$  at room temperature.

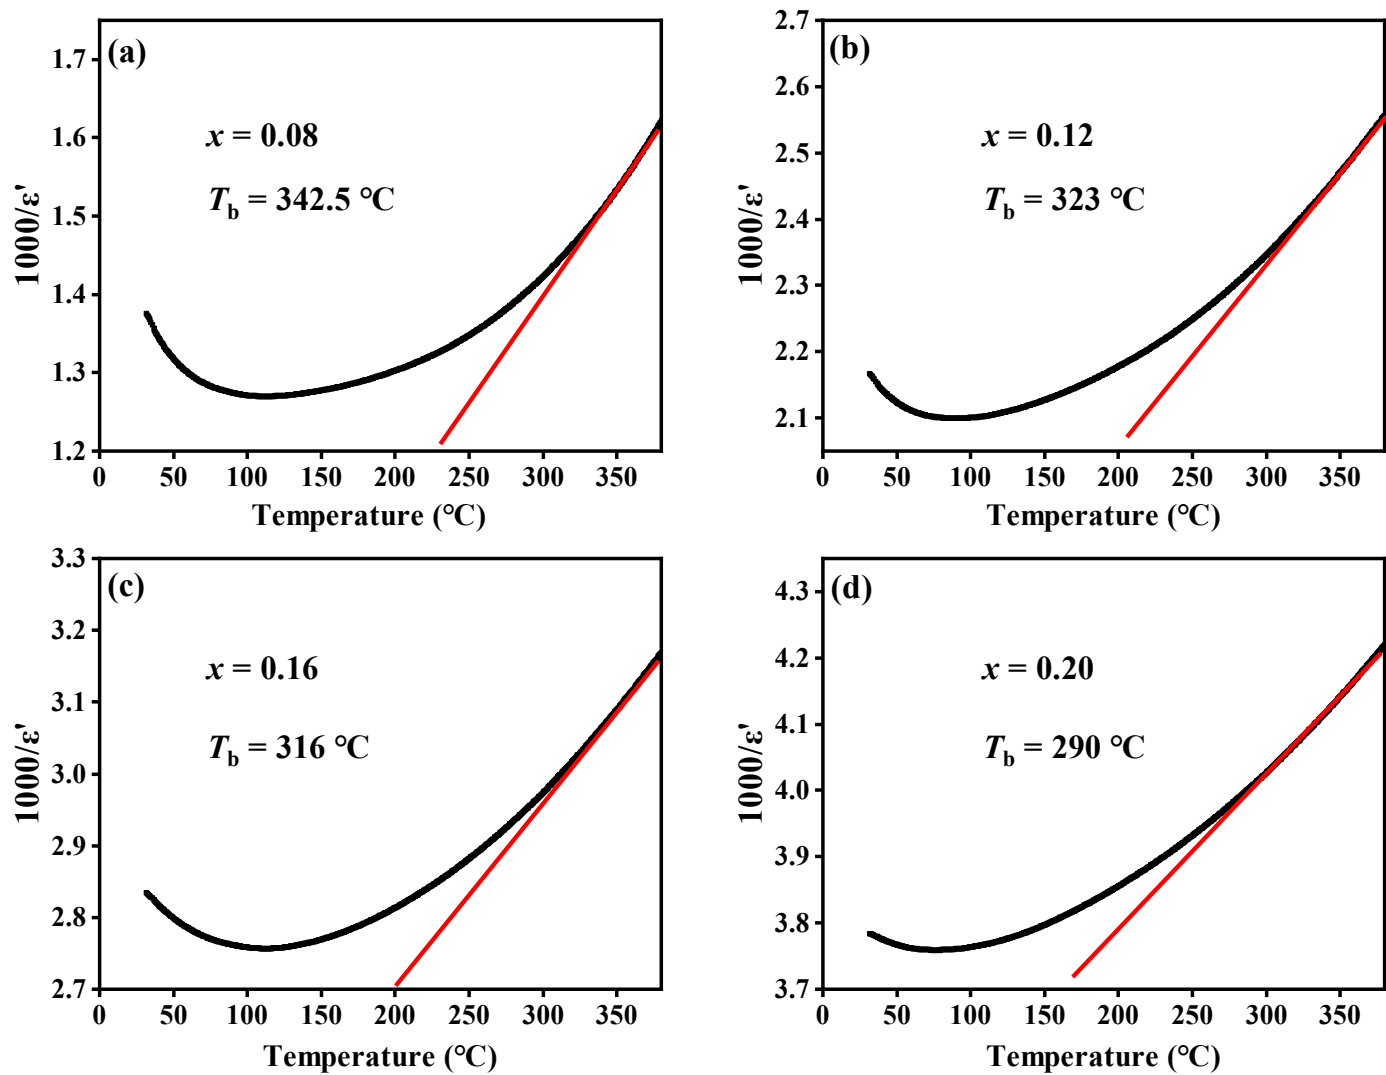

**Figure S3** The burn temperature fitting curve of  $(1-x)\text{BNST}-x\text{SMN}$  ( $x = 0.08, 0.12, 0.16,$  and  $0.20$ ) ceramics.

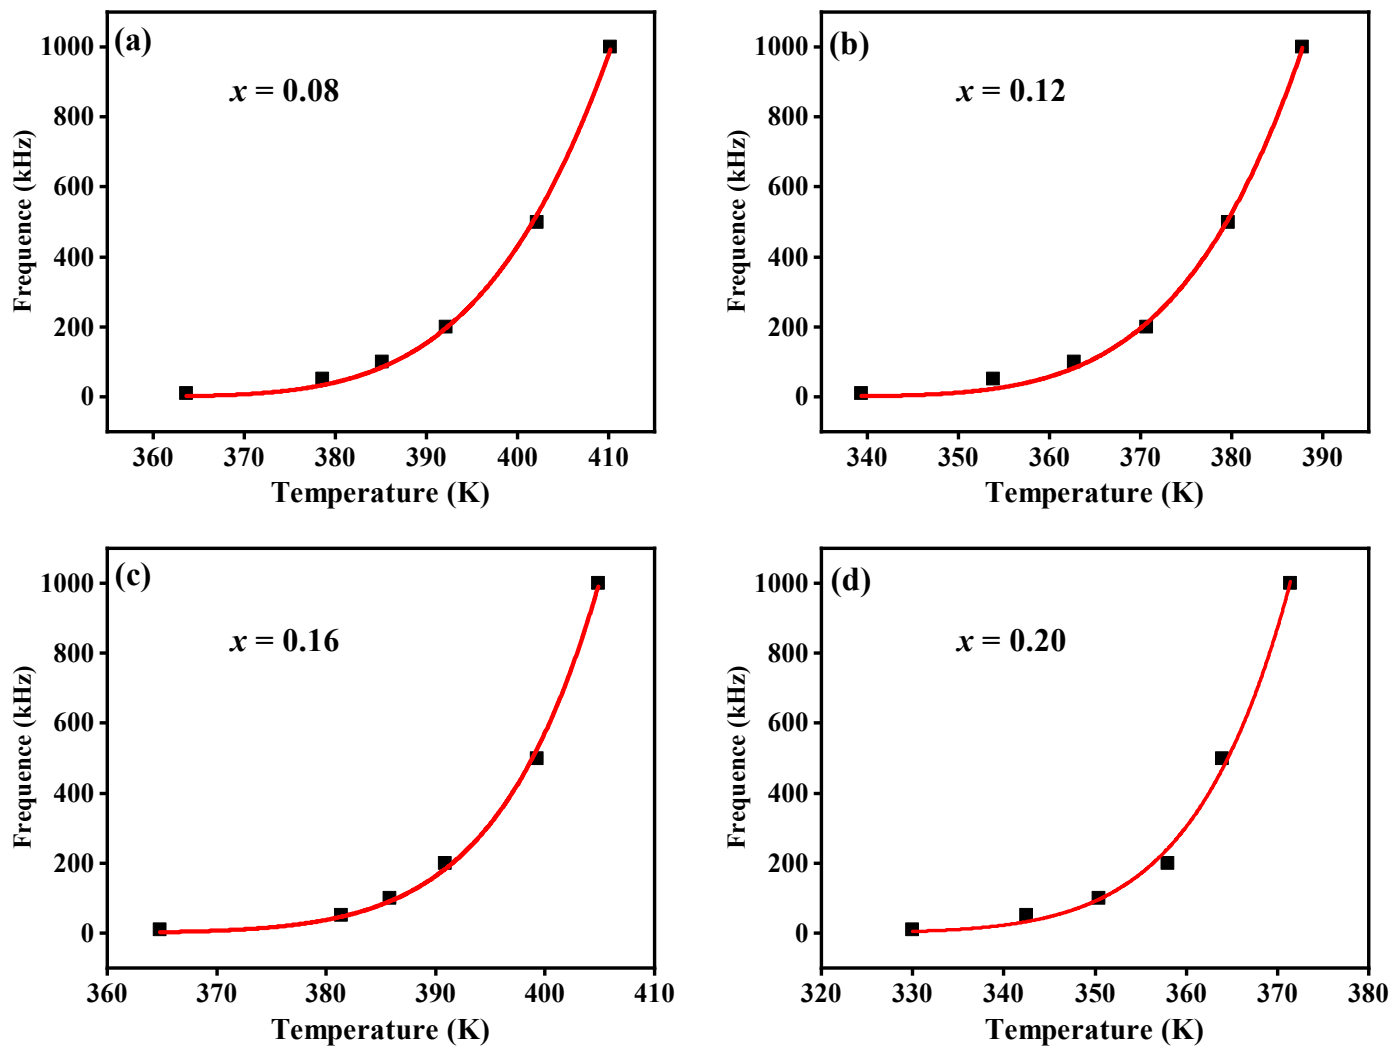

**Figure S4** The frozen temperature fitting curve of (1-x)BNST-xSMN ( $x = 0.08, 0.12, 0.16, \text{ and } 0.20$ ) ceramics
